# Supplementary material for: Radiation dosimetry and first therapy results with a 124I/131I-labeled small molecule (MIP-1095) targeting PSMA for prostate cancer therapy
Source: Springer Nature journal article supplement (doi:10.1007/s00259-014-2713-y), 2014-02-27
Supplement: MOESM7 [file 8219044]

Supplementary table F Biologically Equivalent Dose (BED) Worksheet for I-131 MIP-1095  
 Computations from I-124 Data in Patients from Heidelberg, Germany

| Assumptions                                         |                 |                                                                  |               |          |           |                   |                   |                   |                          | Kidney mass                                                                                                                              |              | 299 gm (OLINDA phantom) |            |                        |                  |                                          |                                          |                                          |                                          | # Fractions                              |                                          |               | # Fractions |               |            | # Fractions   |            |               |            |               |            |             |  |  |
|-----------------------------------------------------|-----------------|------------------------------------------------------------------|---------------|----------|-----------|-------------------|-------------------|-------------------|--------------------------|------------------------------------------------------------------------------------------------------------------------------------------|--------------|-------------------------|------------|------------------------|------------------|------------------------------------------|------------------------------------------|------------------------------------------|------------------------------------------|------------------------------------------|------------------------------------------|---------------|-------------|---------------|------------|---------------|------------|---------------|------------|---------------|------------|-------------|--|--|
| alpha/beta= 2,6 Gy                                  |                 | G-function= Lea-Catcheside function for bi-exponential clearance |               |          |           |                   |                   |                   |                          | Tp(I-131)                                                                                                                                |              | 192,48 hr               |            | # Fractions 1          |                  | # Fractions 2                            |                                          | # Fractions 3                            |                                          | # Fractions 1                            |                                          | # Fractions 2 |             | # Fractions 3 |            | # Fractions 1 |            | # Fractions 2 |            | # Fractions 3 |            |             |  |  |
| T(repair)= 2,8 hr                                   |                 | BED = D(cort)*RE                                                 |               |          |           |                   |                   |                   |                          | Lambda_P                                                                                                                                 |              | 0,00360                 |            | Activity for 37 Gy BED |                  | Activity for 44 Gy BED                   |                                          | Activity for 37 Gy BED                   |                                          | Activity for 44 Gy BED                   |                                          | BED (Gy) 37   |             | BED (Gy) 44   |            | BED (Gy) 37   |            | BED (Gy) 44   |            | BED (Gy) 37   |            | BED (Gy) 44 |  |  |
| u(repair)= 0,248 /hr                                |                 | RE = 1 + G*D(cort)/(alpha/beta)                                  |               |          |           |                   |                   |                   |                          |                                                                                                                                          |              |                         |            |                        |                  |                                          |                                          |                                          |                                          |                                          |                                          |               |             |               |            |               |            |               |            |               |            |             |  |  |
| v mean density 1,00 g/cc                            |                 |                                                                  |               |          |           |                   |                   |                   |                          |                                                                                                                                          |              |                         |            |                        |                  |                                          |                                          |                                          |                                          |                                          |                                          |               |             |               |            |               |            |               |            |               |            |             |  |  |
| Patient ID                                          | m(kidney) grams | D(phan) Gy                                                       | D(patient) Gy | a1(kid)  | a2(kid)   | lambda_1(Bio) /hr | lambda_2(Bio) /hr | lambda_1(eff) /hr | lambda_2(eff) /hr        | G1,2-function                                                                                                                            | A(total) GBq | D(cort) Gy              | RE@D(cort) | BED Gy                 | D(cort)/A Gy/GBq | # Fractions 1 Activity for 37 Gy BED GBq | # Fractions 1 Activity for 44 Gy BED GBq | # Fractions 2 Activity for 37 Gy BED GBq | # Fractions 2 Activity for 44 Gy BED GBq | # Fractions 3 Activity for 37 Gy BED GBq | # Fractions 3 Activity for 44 Gy BED GBq | D(cort) Gy    | D(cort) Gy  | D(cort) Gy    | D(cort) Gy | D(cort) Gy    | D(cort) Gy | D(cort) Gy    | D(cort) Gy | D(cort) Gy    | D(cort) Gy |             |  |  |
| 98                                                  |                 |                                                                  |               |          |           |                   |                   |                   |                          |                                                                                                                                          |              |                         |            |                        |                  |                                          |                                          |                                          |                                          |                                          |                                          |               |             |               |            |               |            |               |            |               |            |             |  |  |
| 07                                                  | 314,8           | 2,9                                                              | 2,8           | 0,018228 | 0,011782  | 0,40151           | 0,028707          | 0,4051            | 0,0323                   | 0,1289                                                                                                                                   | 7,2          | 3,97                    | 1,20       | 4,75                   | 0,55             | 34,6                                     | 38,8                                     | 42,5                                     | 48,2                                     | 47,0                                     | 53,7                                     | 19,04         | 21,37       | 23,41         | 26,54      | 25,91         | 29,56      | 25,91         | 29,56      | 25,91         | 29,56      |             |  |  |
| 04                                                  | 437,19          | 13,9                                                             | 9,5           | 0,066277 |           | 0,009539          |                   | 0,0131            | 0,0036                   | 0,0504                                                                                                                                   | 6,0          | 13,54                   | 1,26       | 17,10                  | 2,26             | 11,1                                     | 12,6                                     | 12,8                                     | 14,7                                     | 13,7                                     | 15,8                                     | 24,94         | 28,38       | 28,90         | 33,27      | 30,85         | 35,74      | 30,85         | 35,74      | 30,85         | 35,74      |             |  |  |
| 05                                                  | 258,56          | 1,0                                                              | 1,1           | 0,004697 | 0,003771  | 0,468341          | 0,033809          | 0,4719            | 0,0374                   | 0,1418                                                                                                                                   | 3,5          | 1,60                    | 1,09       | 1,73                   | 0,46             | 40,4                                     | 45,3                                     | 50,0                                     | 56,6                                     | 55,6                                     | 63,3                                     | 18,44         | 20,68       | 22,81         | 25,82      | 25,33         | 28,86      | 25,33         | 28,86      | 25,33         | 28,86      |             |  |  |
| 02                                                  | 305,27          | 2,0                                                              | 2,0           | 0        | 0,013537  | 0,004525          | 0,009568          | 0,0081            | 0,0132                   | 0,0505                                                                                                                                   | 3,4          | 2,80                    | 1,05       | 2,95                   | 0,82             | 30,3                                     | 34,5                                     | 35,1                                     | 40,4                                     | 37,5                                     | 43,4                                     | 24,93         | 28,37       | 28,89         | 33,26      | 30,84         | 35,73      | 30,84         | 35,73      | 30,84         | 35,73      |             |  |  |
| 01                                                  | 398,61          | 4,6                                                              | 3,4           | 0        | 0,02271   | 0,202355          | 0,009089          | 0,2060            | 0,0127                   | 0,0488                                                                                                                                   | 5,0          | 4,91                    | 1,09       | 5,37                   | 0,98             | 25,6                                     | 29,1                                     | 29,6                                     | 34,1                                     | 31,5                                     | 36,6                                     | 25,14         | 28,63       | 29,07         | 33,48      | 30,99         | 35,93      | 30,99         | 35,93      | 30,99         | 35,93      |             |  |  |
| 03                                                  | 665,62          | 7,7                                                              | 3,5           | 0,040268 |           | 0,012804          |                   | 0,0164            | 0,0036                   | 0,0622                                                                                                                                   | 6,7          | 4,94                    | 1,12       | 5,53                   | 0,74             | 32,0                                     | 36,3                                     | 37,6                                     | 43,2                                     | 40,5                                     | 46,8                                     | 23,64         | 26,81       | 27,78         | 31,86      | 29,88         | 34,51      | 29,88         | 34,51      | 29,88         | 34,51      |             |  |  |
| 10                                                  | 376,82          | 4,2                                                              | 3,3           | 0,02787  |           | 0,01079           |                   | 0,0144            | 0,0036                   | 0,0549                                                                                                                                   | 4,7          | 4,71                    | 1,10       | 5,18                   | 1,00             | 24,4                                     | 27,7                                     | 28,4                                     | 32,6                                     | 30,4                                     | 35,2                                     | 24,41         | 27,74       | 28,45         | 32,70      | 30,46         | 35,25      | 30,46         | 35,25      | 30,46         | 35,25      |             |  |  |
| 09                                                  | 530,78          | 10,7                                                             | 6,0           | 0,013469 | 0,026378  | 0                 | 0,044828          | 0,0036            | 0,0484                   | 0,0190                                                                                                                                   | 5,4          | 8,60                    | 1,06       | 9,15                   | 1,59             | 19,0                                     | 22,0                                     | 20,7                                     | 24,2                                     | 21,4                                     | 25,2                                     | 30,28         | 35,02       | 33,01         | 38,56      | 34,15         | 40,08      | 34,15         | 40,08      | 34,15         | 40,08      |             |  |  |
| 11                                                  | 520,46          | 12,0                                                             | 6,9           | 0,045709 |           | 0,006465          |                   | 0,0101            | 0,0036                   | 0,0391                                                                                                                                   | 6,0          | 9,85                    | 1,15       | 11,31                  | 1,64             | 16,1                                     | 18,4                                     | 18,4                                     | 21,2                                     | 19,4                                     | 22,6                                     | 26,47         | 30,25       | 30,16         | 34,86      | 31,90         | 37,10      | 31,90         | 37,10      | 31,90         | 37,10      |             |  |  |
| 06                                                  | 460,42          | 11,0                                                             | 7,2           | 0,010385 | 0,012381  | 0,036299          | 0                 | 0,0399            | 0,0036                   | 0,0163                                                                                                                                   | 5,9          | 10,24                   | 1,06       | 10,89                  | 1,73             | 17,9                                     | 20,7                                     | 19,3                                     | 22,6                                     | 19,9                                     | 23,4                                     | 30,98         | 35,91       | 33,48         | 39,19      | 34,51         | 40,56      | 34,51         | 40,56      | 34,51         | 40,56      |             |  |  |
| 16                                                  | 593,66          | 10,0                                                             | 5,0           | 0,055095 |           | 0,011306          |                   | 0,0149            | 0,0036                   | 0,0568                                                                                                                                   | 6,0          | 7,21                    | 1,16       | 8,35                   | 1,20             | 20,1                                     | 22,9                                     | 23,5                                     | 27,0                                     | 25,2                                     | 29,2                                     | 24,20         | 27,49       | 28,27         | 32,48      | 30,31         | 35,05      | 30,31         | 35,05      | 30,31         | 35,05      |             |  |  |
| 08                                                  | 682,84          | 17,1                                                             | 7,5           | 0,019044 | 0,00944   | 0                 | 0,09571           | 0,0036            | 0,0993                   | 0,0148                                                                                                                                   | 6,8          | 10,68                   | 1,06       | 11,32                  | 1,57             | 20,0                                     | 23,2                                     | 21,5                                     | 25,2                                     | 22,1                                     | 26,0                                     | 31,40         | 36,46       | 33,77         | 39,56      | 34,72         | 40,84      | 34,72         | 40,84      | 34,72         | 40,84      |             |  |  |
| 15                                                  | 692,01          | 7,2                                                              | 3,1           | 0,041858 |           | 0,010936          |                   | 0,0145            | 0,0036                   | 0,0555                                                                                                                                   | 5,3          | 4,42                    | 1,09       | 4,83                   | 0,83             | 29,2                                     | 33,2                                     | 34,1                                     | 39,2                                     | 36,5                                     | 42,2                                     | 24,35         | 27,67       | 28,40         | 32,64      | 30,42         | 35,19      | 30,42         | 35,19      | 30,42         | 35,19      |             |  |  |
| 13                                                  | 757,4           | 11,4                                                             | 4,5           | 0,036088 | 0         | 0,005753          | 0,000341          | 0,0094            | 0,0039                   | 0,0364                                                                                                                                   | 6,3          | 6,43                    | 1,09       | 7,01                   | 1,02             | 26,3                                     | 30,1                                     | 29,9                                     | 34,6                                     | 31,5                                     | 36,7                                     | 26,88         | 30,75       | 30,49         | 35,28      | 32,17         | 37,45      | 32,17         | 37,45      | 32,17         | 37,45      |             |  |  |
| 99                                                  |                 |                                                                  |               |          |           |                   |                   |                   |                          | NA                                                                                                                                       |              |                         |            |                        |                  |                                          |                                          |                                          |                                          |                                          |                                          |               |             |               |            |               |            |               |            |               |            |             |  |  |
|                                                     |                 |                                                                  |               |          |           |                   |                   |                   |                          |                                                                                                                                          |              |                         |            |                        |                  | Mean                                     | 24,8                                     | 28,2                                     | 28,8                                     | 33,1                                     | 30,9                                     | 35,7          |             |               |            |               |            |               |            |               |            |             |  |  |
|                                                     |                 |                                                                  |               |          |           |                   |                   |                   |                          |                                                                                                                                          |              |                         |            |                        |                  | Min                                      | 11,1                                     | 12,6                                     | 12,8                                     | 14,7                                     | 13,7                                     | 15,8          |             |               |            |               |            |               |            |               |            |             |  |  |
|                                                     |                 |                                                                  |               |          |           |                   |                   |                   |                          |                                                                                                                                          |              |                         |            |                        |                  | Max                                      | 40,4                                     | 45,3                                     | 50,0                                     | 56,6                                     | 55,6                                     | 63,3          |             |               |            |               |            |               |            |               |            |             |  |  |
|                                                     |                 |                                                                  |               |          |           |                   |                   |                   |                          |                                                                                                                                          |              |                         |            |                        |                  | SD                                       | 8,0                                      | 8,9                                      | 10,3                                     | 11,6                                     | 11,7                                     | 13,2          |             |               |            |               |            |               |            |               |            |             |  |  |
| G-function computation (4 components & denominator) |                 |                                                                  |               |          |           |                   |                   |                   |                          |                                                                                                                                          |              |                         |            |                        |                  |                                          |                                          |                                          |                                          |                                          |                                          |               |             |               |            |               |            |               |            |               |            |             |  |  |
| Patient ID                                          | N-term1         | N-term2                                                          | N-term3       | N-term4  | Denom     | G1,2-function     | term1             | term2             | Key to columns/variables |                                                                                                                                          |              |                         |            |                        |                  |                                          |                                          |                                          |                                          |                                          |                                          |               |             |               |            |               |            |               |            |               |            |             |  |  |
| 98                                                  |                 |                                                                  |               |          |           |                   |                   |                   | Patient ID               | Patient ID number                                                                                                                        |              |                         |            |                        |                  |                                          |                                          |                                          |                                          |                                          |                                          |               |             |               |            |               |            |               |            |               |            |             |  |  |
| 07                                                  | 0,001257        | 0,001505                                                         | 0,003509      | 0,015356 | 0,167837  | 0,128856          | 10,089            | 0,1982            | m(kidney)                | patient's total kidney mass from PET/CT (grams, assumes kidney density is 1.0 g/cc)                                                      |              |                         |            |                        |                  |                                          |                                          |                                          |                                          |                                          |                                          |               |             |               |            |               |            |               |            |               |            |             |  |  |
| 04                                                  | 1,282658        | 0,000000                                                         | 0,000000      | 0,000000 | 25,443469 | 0,050412          | 25,787            | 0,0776            | D(phan)                  | Kidney radiation dose from OLINDA for total administered activity (Gy)                                                                   |              |                         |            |                        |                  |                                          |                                          |                                          |                                          |                                          |                                          |               |             |               |            |               |            |               |            |               |            |             |  |  |
| 05                                                  | 0,000065        | 0,000097                                                         | 0,000244      | 0,001334 | 0,012267  | 0,141843          | 9,165             | 0,2182            | D(patient)               | Kidney radiation dose adjusted for patient-specific kidney mass (Gy)                                                                     |              |                         |            |                        |                  |                                          |                                          |                                          |                                          |                                          |                                          |               |             |               |            |               |            |               |            |               |            |             |  |  |
| 02                                                  | 0,000000        | 0,000000                                                         | 0,000000      | 0,053386 | 1,056770  | 0,050518          | 25,734            | 0,0777            | a1(kid)                  | Coefficient #1 of biexponential function for activity in kidney (at t=0; from biological modeling of kidney TAC)                         |              |                         |            |                        |                  |                                          |                                          |                                          |                                          |                                          |                                          |               |             |               |            |               |            |               |            |               |            |             |  |  |
| 01                                                  | 0,000000        | 0,000000                                                         | 0,000000      | 0,156208 | 3,202977  | 0,048770          | 26,656            | 0,0750            | a2(kid)                  | Coefficient #2 of biexponential function for activity in kidney (at t=0; from biological modeling of kidney TAC)                         |              |                         |            |                        |                  |                                          |                                          |                                          |                                          |                                          |                                          |               |             |               |            |               |            |               |            |               |            |             |  |  |
| 03                                                  | 0,374554        | 0,000000                                                         | 0,000000      | 0,000000 | 6,025607  | 0,062160          | 20,914            | 0,0956            | lambda_1(Bio)            | Biological removal rate for component #1 of kidney biodel (1/hr)                                                                         |              |                         |            |                        |                  |                                          |                                          |                                          |                                          |                                          |                                          |               |             |               |            |               |            |               |            |               |            |             |  |  |
| 10                                                  | 0,206102        | 0,000000                                                         | 0,000000      | 0,000000 | 3,750851  | 0,054948          | 23,659            | 0,0845            | lambda_2(Bio)            | Biological removal rate for component #2 of kidney biodel (1/hr)                                                                         |              |                         |            |                        |                  |                                          |                                          |                                          |                                          |                                          |                                          |               |             |               |            |               |            |               |            |               |            |             |  |  |
| 09                                                  | 0,200667        | 0,054390                                                         | 0,046151      | 0,048551 | 18,367060 | 0,019043          | 68,268            | 0,0293            | lambda_1(eff)            | Effective removal rate for component #1, including I-131 decay                                                                           |              |                         |            |                        |                  |                                          |                                          |                                          |                                          |                                          |                                          |               |             |               |            |               |            |               |            |               |            |             |  |  |
| 11                                                  | 0,805909        | 0,000000                                                         | 0,000000      | 0,000000 | 20,622609 | 0,039079          | 33,266            | 0,0601            | lambda_2(eff)            | Effective removal rate for component #2, including I-131 decay                                                                           |              |                         |            |                        |                  |                                          |                                          |                                          |                                          |                                          |                                          |               |             |               |            |               |            |               |            |               |            |             |  |  |
| 06                                                  | 0,009405        | 0,020569                                                         | 0,023543      | 0,169557 | 13,683260 | 0,016303          | 79,741            | 0,0251            | G1,2-function            | Lea-Catcheside function for bi-exponential clearance curve for kidney (computed in cells G35-G48)                                        |              |                         |            |                        |                  |                                          |                                          |                                          |                                          |                                          |                                          |               |             |               |            |               |            |               |            |               |            |             |  |  |
| 16                                                  | 0,776029        | 0,000000                                                         | 0,000000      | 0,000000 | 13,660932 | 0,056806          | 22,885            | 0,0874            | A(total)                 | Total therapy administered activity (GBq)                                                                                                |              |                         |            |                        |                  |                                          |                                          |                                          |                                          |                                          |                                          |               |             |               |            |               |            |               |            |               |            |             |  |  |
| 08                                                  | 0,401163        | 0,013914                                                         | 0,010074      | 0,002587 | 28,992904 | 0,014753          | 88,116            | 0,0227            | D(cort)                  | Radiation dose to renal cortex assuming 70% of total renal volume is cortical.                                                           |              |                         |            |                        |                  |                                          |                                          |                                          |                                          |                                          |                                          |               |             |               |            |               |            |               |            |               |            |             |  |  |
| 15                                                  | 0,459980        | 0,000000                                                         | 0,000000      | 0,000000 | 8,291723  | 0,055475          | 23,434            | 0,0853            | RE@D(cort)               | Relative effectiveness function computed for the total renal/cortical radiation dose (valid only for the patient's IA)                   |              |                         |            |                        |                  |                                          |                                          |                                          |                                          |                                          |                                          |               |             |               |            |               |            |               |            |               |            |             |  |  |
| 13                                                  | 0,542091        | 0,000000                                                         | 0,000000      | 0,000000 | 14,886377 | 0,036415          | 35,699            | 0,0560            | BED                      | Biologically Equivalent Dose for the given patient and his therapeutic cortical radiation dose                                           |              |                         |            |                        |                  |                                          |                                          |                                          |                                          |                                          |                                          |               |             |               |            |               |            |               |            |               |            |             |  |  |
| 99                                                  |                 |                                                                  |               |          |           | 0,055384          |                   |                   | D(cort)/A                | Radiation dose to renal cortex per unit administered activity (Gy/GBq)                                                                   |              |                         |            |                        |                  |                                          |                                          |                                          |                                          |                                          |                                          |               |             |               |            |               |            |               |            |               |            |             |  |  |
|                                                     |                 |                                                                  |               |          |           |                   |                   |                   | Activity for X Gy BED    | This is the activity needed to deliver a BED of X Gy to the renal cortex for a given patient, Computed for 37 & 44 Gy BED, in 1 fraction |              |                         |            |                        |                  |                                          |                                          |                                          |                                          |                                          |                                          |               |             |               |            |               |            |               |            |               |            |             |  |  |
|                                                     |                 |                                                                  |               |          |           |                   |                   |                   | Activity for 2 fractions | This computes the total injected activity that must be split between 2 fractions to achieve 37 & 44 Gy BED                               |              |                         |            |                        |                  |                                          |                                          |                                          |                                          |                                          |                                          |               |             |               |            |               |            |               |            |               |            |             |  |  |
|                                                     |                 |                                                                  |               |          |           |                   |                   |                   | Activity for 3 fractions | This computes the total injected activity that must be split between 3 fractions to achieve 37 & 44 Gy BED                               |              |                         |            |                        |                  |                                          |                                          |                                          |                                          |                                          |                                          |               |             |               |            |               |            |               |            |               |            |             |  |  |
